## Transmission prevention behaviors in US households with SARS-CoV-2 cases in 2020

Rebecca Rubinstein<sup>1</sup>, Wenwen Mei<sup>2</sup>, Caitlin A. Cassidy<sup>1</sup>, Gabrielle Streeter<sup>3</sup>, Christopher Basham<sup>4</sup>, Carla Cerami<sup>4,5</sup>, Feng-Chang Lin<sup>2</sup>, Jessica T. Lin<sup>4</sup>, Katie R. Mollan<sup>1,6</sup>

1. Department of Epidemiology, University of North Carolina at Chapel Hill Gillings School of Global Public Health, Chapel Hill, NC, USA
2. Department of Biostatistics, University of North Carolina at Chapel Hill Gillings School of Global Public Health, Chapel Hill, NC, USA
3. University of North Carolina at Chapel Hill, Chapel Hill, NC, USA
4. Institute of Global Health and Infectious Diseases, University of North Carolina at Chapel Hill School of Medicine, Chapel Hill, NC, USA
5. Medical Research Council Unit, The Gambia, at the London School of Hygiene & Tropical Medicine, The Gambia
6. Center for AIDS Research, University of North Carolina at Chapel Hill School of Medicine, Chapel Hill, NC, USA

### ABSTRACT:

**Background:** SARS-CoV-2 transmission frequently occurs within households, yet few studies describe which household contacts and household units are most likely to engage in transmission-interrupting behaviors.

**Methods:** We analyzed a COVID-19 prospective household transmission cohort in North Carolina (April-Oct 2020) to quantify changes in physical distancing behaviors among household contacts over 14 days. We evaluated which household contacts were most likely to ever mask at home and to ever share a bedroom with the index case between Days 7-14.

**Results:** In the presence of a household COVID-19 infection, 24% of household contacts reported ever masking at home during the week before study entry. Masking in the home between Days 7-14 was reported by 26% of household contacts, and was more likely for participants who observed their household index case wearing a mask. Participants of color and participants in high-density households were more likely to mask at home. After adjusting for race/ethnicity, living density was not as clearly associated with masking. Symptomatic household contacts were more likely to share a bedroom with the index case. Working individuals and those with comorbidities avoided sharing a bedroom with the index case.

**Conclusion:** In-home masking during household exposure to COVID-19 was infrequent in 2020. In light of ongoing transmission of SARS-CoV-2, these findings underscore a need for health campaigns to increase the feasibility and social desirability of in-home masking among exposed household members. Joint messaging on social responsibility and prevention of breakthrough infections, reinfections, and long COVID-19 may help motivate transmission-interruption behaviors.

## INTRODUCTION:

Households are a high-risk setting for transmission of Severe Acute Respiratory Syndrome Coronavirus-2 (SARS-CoV-2), especially when SARS-CoV-2-positive individuals are unable to self-isolate. Infected individuals may face challenges distancing from family members and wearing masks at home, and they are unlikely to take precautions just prior to symptom onset, when viral shedding and infectiousness peak.[1–4] In 2020, before widespread vaccination, high household secondary attack rates were identified in the US, including a rate of 52% among households in Wisconsin and Tennessee and 60% in North Carolina.[4,5] A majority of secondary cases were identified within a week of the index case presenting symptoms.[4,5] Although vaccination greatly reduces the likelihood of severe disease, outbreaks of the more-transmissible Delta and Omicron variants and sub-variants have occurred among vaccinated index cases and close contacts in households across the US.[6–8]

Modifiable risk factors to help interrupt household transmission include masking at home, and avoiding sharing a bedroom with infected individuals.[4,8,9] Previous studies support immediate isolation within one’s household upon testing positive.[8] However, few published studies have characterized which household contacts and household units are most likely to engage in behaviors that interrupt transmission, and the structural barriers that can prevent them from doing so, including high household living density.[10,11]

The aims of the current study are 1) to describe changes in household contacts’ COVID-19 mitigating behaviors (e.g., mask-wearing, sharing a bedroom with primary infected case) between cohort entry and Day 14 of cohort participation and 2) to identify structural and individual-level factors associated with these behaviors at Day 14. We analyzed behavioral data from the COVID-19 Household Transmission Study (CO-HOST), a racially and ethnically diverse cohort of household transmission in central North Carolina conducted from April to October 2020, encompassing rural, suburban and urban households.[4] In 2020, both the original Wuhan strain of SARS-CoV-2 and the D614G “G” variant circulated across the US.[12] At that time, public health guidance recommended 14 days of self-quarantine following possible COVID exposure. Our findings can help guide prevention efforts for household transmission of SARS-CoV-2 in North Carolina and comparable regions. Given the frequency of novel and highly-transmissible SARS-CoV-2 variants and challenges to herd immunity in the US,[13,14] including vaccine hesitancy,[15] a better understanding of behaviors that contribute to preventing transmission in infected households can alleviate future waves of SARS-CoV-2 in the US.

## METHODS:

**Study sample and design:** The CO-HOST study recruited patients infected with SARS-CoV-2 who tested at a UNC Respiratory Diagnostic Center in Chapel Hill, Cary or Raleigh, NC (index cases). Adults testing positive for SARS-CoV-2 were recruited with their household members (household contacts) over 2 years of age, who planned to spend at least 4 weeks in the same house as the index case. The primary aim of CO-HOST was to determine the household secondary attack rate of SARS-CoV-2 infection in central North Carolina. Detailed inclusion criteria, follow-up testing, classification of index cases and household contacts, and study aims have been previously described.[4] Ethical approval for the parent study was received from the Institutional Review Board at the University of North Carolina at Chapel Hill (Protocol Number 20-0982), participants gave informed consent before participating, and the parent study conformed to the principles outlined in the Declaration of Helsinki.

At cohort entry (Day 0), along with PCR nasopharyngeal and saliva testing, we asked all index cases and household contacts whether they ever masked at home in the previous 7 days. Participants were also asked about COVID-19 symptoms, comorbidities, sociodemographic characteristics, and their activities in the prior week. They completed electronic symptom diaries until 2 consecutive days without symptoms or until day 21 if they never developed symptoms. If participants missed  $\geq 2$  days of questionnaires, symptoms were ascertained by study staff over the phone.[4] At Day 14, household contacts again received testing and answered the same questions asked at baseline.

**Outcomes:** Household contacts were asked whether they engaged in the following activities with the index case at cohort entry and Day 14: sharing bedroom, sharing bathroom, sharing kitchen, watching television, eating together, sharing car rides, and sharing electronic devices. The primary behavioral outcomes for inferential analyses were 1) did the household contact ever wear a mask at home between days 7 and 14 (yes/no) and 2) did the household contact ever share a bedroom with the index case between days 7 and 14 (yes/no).

**Exposures:** We assessed the association of the following individual-level factors to the outcomes: age, sex, race/ethnicity, and aged 50 or older/reporting  $\geq 1$  comorbidity. We also assessed the following factors 7-14 days after cohort entry: COVID-19 symptom duration, primary caregiving to the index case, and working outside the home. For each household contact, we assessed household-level exposures including high living density ( $>3$  individuals in  $<6$  rooms, including bedrooms, kitchen, and common rooms, but not bathrooms or garage) and whether the household contact observed the index case wearing a mask 7-14 days after cohort entry.

107

108 **Statistical analysis:** Fourteen-day changes in the proportion of household contacts engaged in shared  
109 behaviors with the index case were estimated among participants with non-missing responses. To account for  
110 clustering within households, we used the Yang modification of Obuchowski's test for changes in paired binary  
111 data[16], executed in the clust.bin.pair package (v01.1.2) of R version 4.0.5.[17]

112

113 We estimated associations between exposure variables and household contacts 1) ever masking at home and  
114 2) sharing a bedroom with the index case at Day 14 using log-binomial models fit with generalized estimating  
115 equations (GEE) to account for clustering of contacts within households (using Windows SAS 9.4). For each  
116 outcome, intra-cluster correlation (ICC) was estimated from an intercept-only model fit with GEE using an  
117 exchangeable working correlation. In sensitivity analyses, missing data were handled using multiple imputation  
118 (MI) for clustered multi-level data, using the jomo package in R version 4.0.2.[18,19] A type I error rate of alpha  
119 0.05 was applied throughout, with no adjustment for multiplicity.

120

## 121 **RESULTS:**

122 Between April and October 2020, 100 households with 204 eligible household contacts were enrolled into CO-  
123 HOST.[4] Two households and 4 household contacts were excluded due to incomplete study follow-up (Figure  
124 S1). A majority of household contacts did not know their own infection status while answering surveys at cohort  
125 entry and Day 14, although they were aware that the index case was infected at study entry. Despite not  
126 necessarily knowing their own infection status, over half (54%) of household contacts at cohort entry reported  
127 symptoms consistent with COVID-19 infection in the previous 7 days (Table 1).

128

129 CO-HOST household contacts were racially and ethnically diverse. Almost half (48%) of the participants self-  
130 identified as Black, Indigenous, or People of Color (BIPOC), including a high proportion of Hispanic/Latinx  
131 participants (34%). Twenty-three percent of participants resided in 'high-density' households, with more than 3  
132 people occupying fewer than 6 living spaces (Table 1). Most participants (86%) lived with at least one other  
133 person at high risk of experiencing complications from COVID-19 infection, including individuals 50 and older  
134 and those with obesity or comorbidities. Together, these characteristics illustrate a cohort of exposed  
135 household members vulnerable to the downstream effects of COVID-19 infection. Baseline characteristics are  
136 shown separately for BIPOC and White non-Hispanic participants (Table 1).

137

138

139

140

**Table 1.** Characteristics of household contacts at cohort entry.

| <b>Variable</b>                                                                                | <b>Overall</b>            | <b>BIPOC<sup>a</sup></b> | <b>White, non-Hispanic</b> |
|------------------------------------------------------------------------------------------------|---------------------------|--------------------------|----------------------------|
| <b>Household-level characteristics</b>                                                         | <b>N=100 households</b>   | <b>N=54 households</b>   | <b>N=46 households</b>     |
| Number of household members in each household                                                  |                           |                          |                            |
| <i>2 people</i>                                                                                | 27 (27.0)                 | 14 (25.9)                | 13 (28.3)                  |
| <i>3 people</i>                                                                                | 23 (23.0)                 | 11 (20.4)                | 12 (26.1)                  |
| <i>4 people</i>                                                                                | 22 (22.0)                 | 9 (16.7)                 | 13 (28.3)                  |
| <i>5 or more people</i>                                                                        | 28 (28.0)                 | 20 (37.0)                | 8 (17.4)                   |
| Number of rooms in house <sup>b</sup>                                                          |                           |                          |                            |
| <i>2 or fewer rooms</i>                                                                        | 10 (10.0)                 | 7 (13.0)                 | 3 (6.5)                    |
| <i>3-5 rooms</i>                                                                               | 43 (43.0)                 | 31 (57.4)                | 12 (26.1)                  |
| <i>6 or more rooms</i>                                                                         | 47 (47.0)                 | 16 (29.6)                | 31 (67.4)                  |
| Number of square feet in house                                                                 |                           |                          |                            |
| <i>&lt;500 sq feet (&lt;46.5 sq m)</i>                                                         | 3 (3.0)                   | 2 (3.7)                  | 1 (2.2)                    |
| <i>500-1000 sq feet (46.5-93 sq m)</i>                                                         | 17 (17.0)                 | 12 (22.2)                | 5 (10.9)                   |
| <i>1000-2000 sq feet (93-186 sq m)</i>                                                         | 33 (33.0)                 | 19 (35.2)                | 14 (30.4)                  |
| <i>&gt;2000 sq feet (&gt;186 sq m)</i>                                                         | 42 (42.0)                 | 16 (29.6)                | 26 (56.5)                  |
| <i>Unknown</i>                                                                                 | 5 (5.0)                   | 5 (9.3)                  | 0 (0.0)                    |
| Household with high living density <sup>c</sup>                                                |                           |                          |                            |
| <i>Yes</i>                                                                                     | 23 (23.0)                 | 20 (37.0)                | 3 (6.5)                    |
| <i>No</i>                                                                                      | 77 (77.0)                 | 34 (63.0)                | 43 (93.5)                  |
| % of household members (including index cases) with COVID-like symptoms by Day 7 <sup>de</sup> |                           |                          |                            |
| <i>&lt;50%</i>                                                                                 | 14 (22.6)                 | 7 (21.2)                 | 7 (24.1)                   |
| <i>50 to &lt;100%</i>                                                                          | 15 (24.2)                 | 8 (24.2)                 | 7 (24.1)                   |
| <i>100% (all members)</i>                                                                      | 33 (53.2)                 | 18 (54.6)                | 15 (51.7)                  |
| <i>Missing</i>                                                                                 | 4                         | 2                        |                            |
| <b>Individual-level characteristics</b>                                                        | <b>N=204 participants</b> | <b>N=97 participants</b> | <b>N=107 participants</b>  |
| Age                                                                                            |                           |                          |                            |
| <i>0-12y</i>                                                                                   | 46 (22.6)                 | 23 (23.7)                | 23 (21.5)                  |
| <i>13-17y</i>                                                                                  | 24 (11.8)                 | 12 (12.4)                | 12 (11.2)                  |
| <i>18-24y</i>                                                                                  | 25 (12.3)                 | 11 (11.3)                | 14 (13.1)                  |
| <i>25-49y</i>                                                                                  | 67 (32.8)                 | 35 (36.1)                | 32 (29.9)                  |
| <i>50-64y</i>                                                                                  | 30 (14.7)                 | 10 (10.3)                | 20 (18.7)                  |
| <i>&gt;65y</i>                                                                                 | 12 (5.9)                  | 6 (6.2)                  | 6 (5.6)                    |
| Current Sex                                                                                    |                           |                          |                            |
| <i>Male</i>                                                                                    | 98 (48.9)                 | 46 (47.4)                | 52 (48.6)                  |
| <i>Female</i>                                                                                  | 106 (52.0)                | 51 (52.6)                | 55 (51.4)                  |
| Race/Ethnicity                                                                                 |                           |                          |                            |

It is made available under a [CC-BY-NC 4.0 International license](https://creativecommons.org/licenses/by-nc/4.0/) .

|                                                          |            |           |           |
|----------------------------------------------------------|------------|-----------|-----------|
| <i>White, non-Hispanic</i>                               | 107 (52.5) |           |           |
| <i>Hispanic/Latinx</i>                                   | 70 (34.3)  |           |           |
| <i>Black, non-Hispanic</i>                               | 18 (8.8)   |           |           |
| <i>Other Race/Unknown Race<sup>f</sup>, non-Hispanic</i> | 9 (4.4)    |           |           |
| <b>Education</b>                                         |            |           |           |
| <i>Children under 18</i>                                 | 70 (35.0)  | 35 (37.6) | 35 (32.7) |
| <i>Adult, high-school or less</i>                        | 63 (31.5)  | 41 (44.1) | 22 (20.6) |
| <i>College degree</i>                                    | 38 (19.0)  | 11 (11.8) | 27 (25.2) |
| <i>Graduate degree</i>                                   | 29 (14.5)  | 6 (6.5)   | 23 (21.5) |
| <i>Missing</i>                                           | 4          |           |           |
| <b>Any comorbidities<sup>g</sup></b>                     |            |           |           |
| <i>Yes</i>                                               | 71 (35.5)  | 38 (40.0) | 33 (31.4) |
| <i>No</i>                                                | 129 (64.5) | 57 (60.0) | 72 (68.6) |
| <i>Missing</i>                                           | 4          | 2         | 2         |
| <b>BMI <math>\geq 30^h</math></b>                        |            |           |           |
| <i>Yes</i>                                               | 46 (31.9)  | 27 (46.6) | 19 (22.1) |
| <i>No</i>                                                | 98 (68.1)  | 31 (53.5) | 67 (77.9) |
| <i>Missing</i>                                           | 18         | 17        | 1         |
| <b>COVID-19 like symptoms in past 7 days<sup>d</sup></b> |            |           |           |
| <i>Yes</i>                                               | 109 (54.0) | 49 (51.6) | 60 (56.1) |
| <i>No</i>                                                | 93 (46.0)  | 46 (48.4) | 47 (43.9) |
| <i>Missing</i>                                           | 2          | 2         | 0         |
| <b>Relationship to primary infected case</b>             |            |           |           |
| <i>Partner</i>                                           | 58 (28.7)  | 21 (22.1) | 37 (34.6) |
| <i>Child</i>                                             | 68(33.7)   | 32 (33.7) | 36 (33.6) |
| <i>Sibling, including in-laws</i>                        | 19 (9.4)   | 13 (13.7) | 6 (5.6)   |
| <i>Parent, including in-laws</i>                         | 35 (17.3)  | 19 (20.0) | 16 (15.0) |
| <i>Roommate/friend</i>                                   | 15 (7.4)   | 7 (7.4)   | 8 (7.5)   |
| <i>Other relative/other</i>                              | 7 (3.5)    | 3 (3.2)   | 4 (3.7)   |
| <i>Missing</i>                                           | 2          | 2         |           |
| <b>Caregiver to primary infected case<sup>h</sup></b>    |            |           |           |
| <i>Yes</i>                                               | 58 (38.7)  | 21 (31.8) | 37 (44.1) |
| <i>No</i>                                                | 92 (61.3)  | 45 (68.2) | 47 (56.0) |
| <i>Missing</i>                                           | 12         | 9         | 3         |
| <b>Index case ever wore mask in the home past 7 days</b> |            |           |           |
| <i>Yes</i>                                               | 153 (80.1) | 79 (90.8) | 74 (71.2) |
| <i>No</i>                                                | 38 (19.9)  | 8 (9.2)   | 30 (28.9) |
| <i>Missing</i>                                           | 13         | 10        | 3         |
| <b>Live with someone under 18<sup>j</sup></b>            |            |           |           |
| <i>Yes</i>                                               | 72 (50.4)  | 31 (49.2) | 41 (51.3) |
| <i>No</i>                                                | 71 (49.7)  | 32 (50.8) | 39 (48.8) |
| <b>Association to healthcare facility<sup>jk</sup></b>   |            |           |           |

It is made available under a [CC-BY-NC 4.0 International license](https://creativecommons.org/licenses/by-nc/4.0/) .

|                                                                      |            |           |           |
|----------------------------------------------------------------------|------------|-----------|-----------|
| <i>Works in a healthcare facility</i>                                | 7 (5.0)    | 2 (3.2)   | 5 (6.3)   |
| <i>Household includes someone who works in a healthcare facility</i> | 18 (12.8)  | 6 (9.7)   | 12 (15.2) |
| <i>Neither</i>                                                       | 116 (82.3) | 54 (87.1) | 62 (78.5) |
| <i>Missing</i>                                                       | 2          | 1         | 1         |

a Includes non-Hispanic Black, Hispanic/Latinx of any race, Asian American and Pacific Islander, Native American and Alaska Native, Other race, and Mixed race. Households were considered to be BIPOC if at least one CO-HOST participant (index case or household contact) self-identified as BIPOC.

b Including bedrooms, kitchen, and common rooms, but not bathrooms or garage

c >3 persons occupying <6 rooms, including bedrooms, kitchen, and common rooms, but not bathrooms or garage

d Symptoms assessed in daily symptom surveys included fever, chills, muscle aches, runny nose, sore throat, loss of taste or smell, cough, shortness of breath, chest pain, wheezing, nausea, diarrhea, headache, abdominal pain.

e N=66 households in which every member of the household was enrolled.

f Self-identified races include American Indian or Alaska Native, Asian, Native Hawaiian or Other Pacific Islander, Other Race, Unknown Race, or Refusal

g Comorbidities include HIV, chronic lung disease (e.g. emphysema, COPD), asthma, daily smoking, heart disease (e.g. previous heart attack, heart failure, stents), morbid obesity (>100 pounds over ideal weight), diabetes, high blood pressure, chronic kidney disease, chronic liver disease, weak immune system due to disease or medication, and recent (within past 2 weeks) or current pregnancy.

h Includes participants ages 12 and over

i Other relationships include sibling, parent, other relative, roommate and friend/non-roommate

j N=143 household contacts who live in households in which every member of the household was enrolled.

k Worked in a healthcare facility in the past 14 days or live with someone who worked in a healthcare facility in last 14 days

We first assessed changes in household contact behavior from cohort entry to Day 14 (Figure 1; Table S1). Several space-sharing behaviors declined from cohort entry to Day 14, including the proportion of household contacts who shared a bedroom (36% vs. 27%,  $p \leq 0.02$  or kitchen (91% vs. 76%,  $p \leq 0.003$ ) with the index case. The proportions who ate with the index case (68% vs. 55%,  $p \leq 0.02$ ) or rode in a car with the index case (62% vs. 41%,  $p \leq 0.001$ ) also declined. Still, most contacts shared a kitchen (76%) or bathroom (56%) with the index case and ate or watched TV with (55% each) the index case between Days 7-14. Despite the prevalence of sharing indoor spaces, only 24% and 26% of household contacts reported that they ever masked at home at cohort entry and Day 14, respectively (Figure 1; Table S1).

We also assessed individual and household-level factors associated with 1) ever masking at home and 2) ever sharing a bedroom with the index case between Days 7-14. Intra-household correlation was high for the masking variable and the bedroom variable (ICC of 0.81 and 0.60, respectively). Seventy-four of 204 household contacts were missing masking data (36%) and 41 of 204 household contacts were missing bedroom data (20%) among Days 7-14.

Household contacts who self-identified as BIPOC were more likely to report masking between Days 7-14 than White, non-Hispanic contacts (Prevalence Ratio [PR]=2.0, 95% CI 1.1, 3.6). Multiple imputation (MI) did not change the strength of this association (PR=2.0, 95% CI 1.1, 3.8). Household contacts who observed the index case masking between days 7-14 were also more likely to mask at home (PR=2.0, 95% CI 1.2, 3.4). This association largely persisted in the MI analysis (PR=2.0, 95% CI 0.9, 4.2) (Figure 2; Figure S2). Contacts with longer symptom duration were also more likely to mask at home in complete case analyses (PR=1.9, 95% CI 1.0, 3.6), although this relationship did not persist in MI (PR=1.1, 95% CI 0.6, 2.0).

182

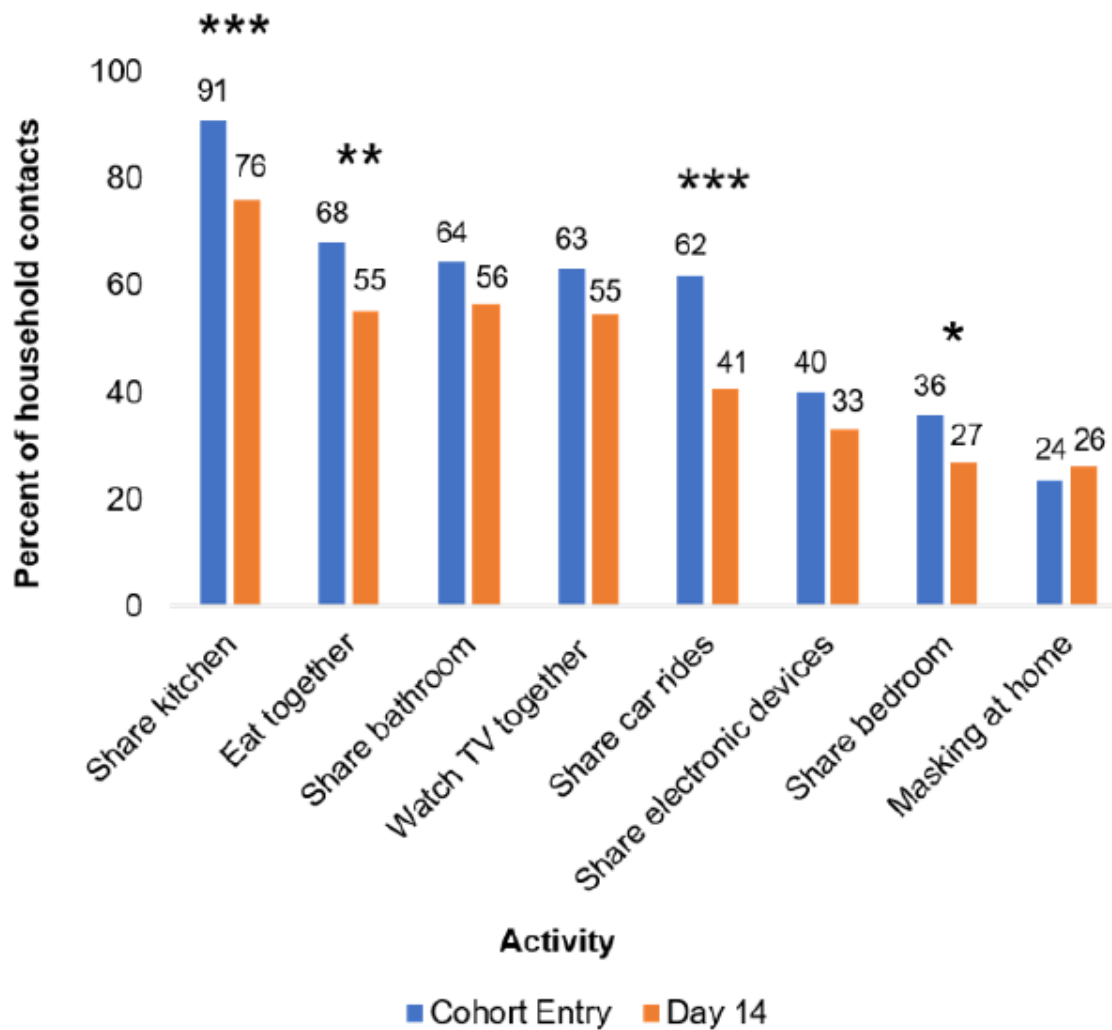

183

184 **Figure 1. Changes in Household Contact Behaviors from Cohort Entry to Day 14.** Entry encompasses the  
185 7 days prior to cohort entry plus the day of enrollment. Day 14 encompasses Days 7-14 of participation in the  
186 cohort. Participants with non-missing data at both cohort entry and Day 14 were included in analysis.  
187 Prevalence of behaviors at each time point listed above bars. \* denotes  $p \leq 0.05$ , \*\* denotes  $p \leq 0.01$ , and \*\*\*  
188 denotes  $p \leq 0.001$ . P-values were calculated using Yang's test for changes from Day 0 to Day 14 on complete  
189 cases (Table S1). 24 and 74 participants were missing 'masking at home' responses at Day 0 and Day 14  
190 respectively, and 41 participants were missing responses for all other variables.  
191

192 Different factors predicted whether household contacts shared a bedroom with the index case between Days  
193 7-14. In both complete case and imputed analyses, household contacts were more likely to have shared a  
194 bedroom with the index case if they 1) reported 4 or more days of symptoms between days 7-14 or 2) identified  
195 as the primary caregiver to the index case between days 7-14 (Figure 3, Figure S3). Conversely, household  
196 contacts at increased risk of severe COVID-19 infection avoided sharing a bedroom with the index case in  
197 complete case (PR=0.6, 95% CI 0.4, 1.1) and imputed analyses (PR=0.7, 95% CI 0.4, 1.1). There was no  
198 evidence of an association between household contact race/ethnicity and bedroom-sharing in complete case,  
199 nor imputed sensitivity analyses (PR=1.0, 95% CI 0.6, 1.7). Similarly, index masking behavior was not  
200



It is made available under a [CC-BY-NC 4.0 International license](https://creativecommons.org/licenses/by-nc/4.0/).

associated with household contacts sharing a bedroom with the index case in neither complete case (PR=1.1, 95% CI 0.6, 2.1) nor imputed analyses (PR=1.2, 95% CI 0.7, 2.0) (Figure 3; Figure S3).

### Mask Use Inside Home Between Days 7-14 Prevalence Ratio and 95% CI

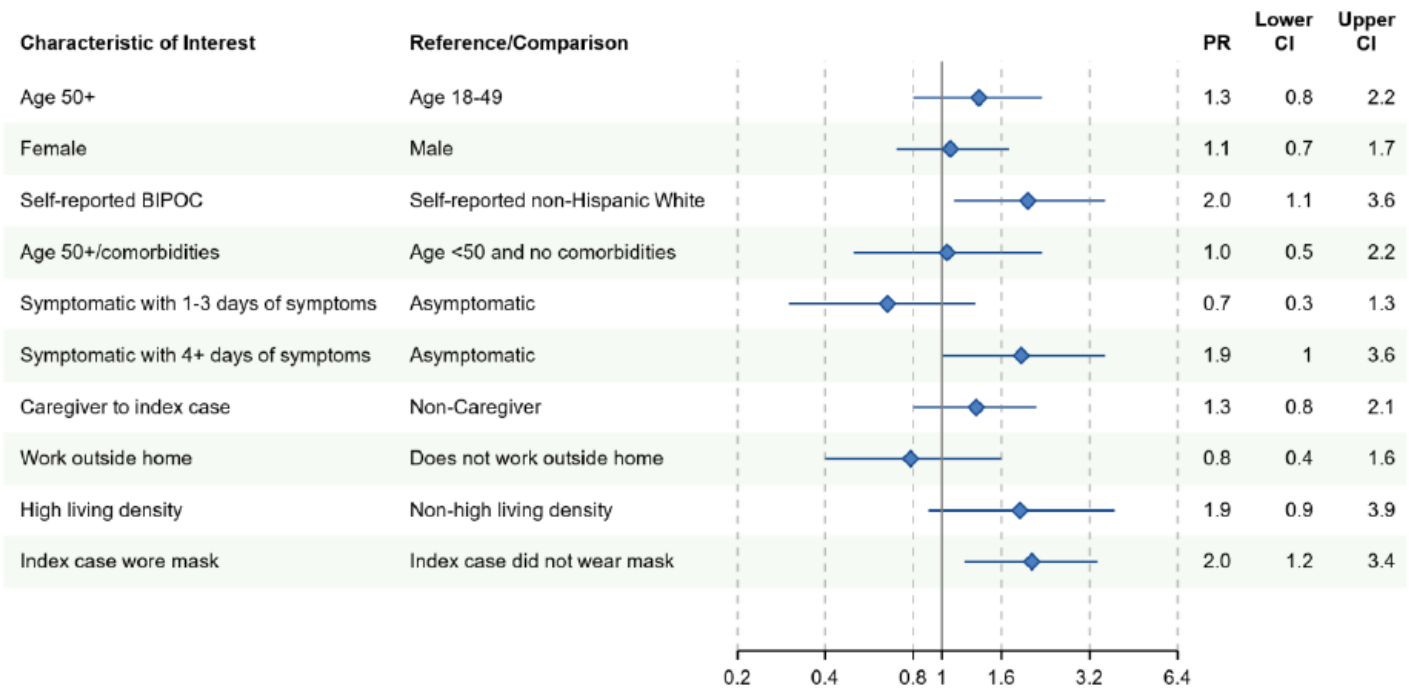

**Figure 2. Bivariate complete case analyses of factors associated with wearing a mask at home at any time between Days 7-14 of cohort participation.** Dots (PR) and solid lines (95% CI) display the complete case analyses. PR and 95% CI are displayed on the natural log scale. Vertical solid line denotes the null value of the PR. X-axis labels correspond to the PR values. Sample sizes and prevalence estimates are shown in Table S4. BIPOC=Black, Indigenous, People of Color; CI=confidence interval; PR=prevalence ratio.

Lastly, given the associations between race/ethnicity and masking, and living density and masking, we sought to determine whether living density differed among BIPOC and White, non-Hispanic participants who masked versus those who did not. Among study participants, BIPOC were more likely than White non-Hispanics to live in a high-density-household (Table 2S, Table 3S). Among BIPOC household contacts, the likelihood of in-home masking was similar for those in a high living density household vs. a lower density household in both complete-case (PR=1.3, 95% CI 0.5, 3.1) and MI (PR= 1.2, 95% CI 0.6 2.5). The association between living in a high-density household and masking was attenuated towards the null when adjusted for BIPOC race/ethnicity in both complete case (PR=1.3, 95% CI 0.6, 3.0) and MI analysis (PR=1.2, 95% CI 0.6, 2.5).

It is made available under a [CC-BY-NC 4.0 International license](https://creativecommons.org/licenses/by-nc/4.0/).

### Shared Bedroom with Index Case Between Days 7-14 Prevalence Ratio and 95% CI

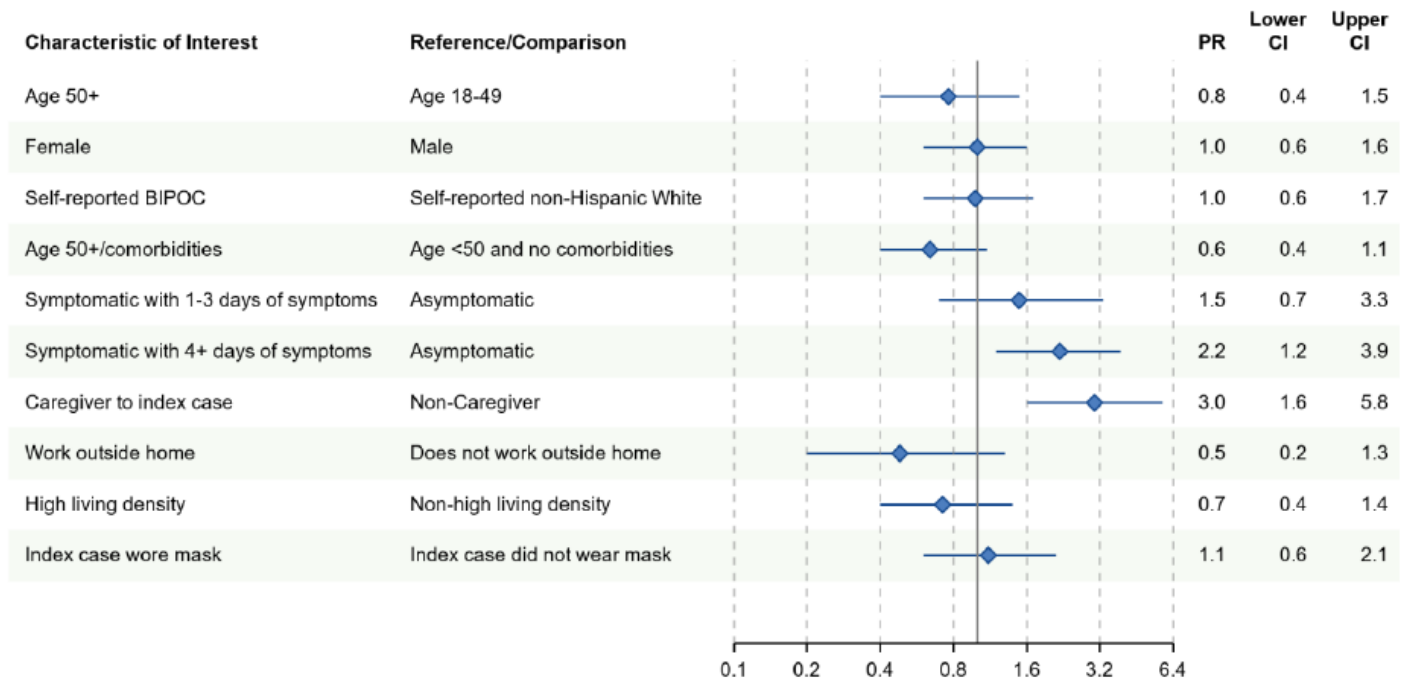

224

225

**Figure 3. Bivariate complete case analysis of factors associated with sharing a bedroom with the index case at any time between Days 7-14 of cohort participation.** Dots (PR) and solid lines (95% CI) display the complete case analyses. PR and 95% CI are displayed on the natural log scale. Vertical solid line denotes the null value of the PR. X-axis labels correspond to the PR values. Sample sizes and prevalence estimates are shown in Table S4. BIPOC=Black, Indigenous, People of Color; CI=confidence interval; PR=prevalence ratio. Table denotes the PR, lower 95% CI and upper 95% CI.

226

227

228

229

230

231

232

### DISCUSSION:

233

We prospectively examined associations between household and individual-level factors and transmission-modifying behaviors in households with active COVID-19 infections in a racially and ethnically diverse sample of North Carolina residents. Throughout the 14 days of observation, most household contacts reported not masking inside the home at any time. Nonetheless, we find that household contacts of color and contacts who observed the index case masking were much more likely to mask.

234

235

236

237

238

239

Throughout the study period, over 50% of household contacts continued to share kitchen space, share a bathroom, eat meals and watch TV with the index case. Our findings suggest that changing behaviors constrained by space and resources such as sharing bathrooms and kitchens may be difficult for households. Masking, alternatively, is an inexpensive intervention accessible to most people. Targeted demographic groups, such as White, non-Hispanic households, could be encouraged to mask more frequently, and encouraging infected or symptomatic individuals to mask at home may help convince other household members to also mask.

240

241

242

243

244

245

246

247 Unlike other studies that measured household transmission of SARS-CoV-2,[8] or behavioral interventions at  
248 the community level, our study prospectively measured the behaviors of household contacts after an initial  
249 household infection was identified. In early 2022, Baker and colleagues reported a retrospective analysis of  
250 behaviors of household members exposed to SARS-CoV-2 in Chicago, Milwaukee, Connecticut, and Utah in  
251 the winter of 2021-2022. However, their analysis did not identify demographic characteristics of household  
252 contacts who engaged in behaviors such as masking, instead focusing on behaviors associated with  
253 transmission,[8] as did our primary analysis of CO-HOST participants.[4]

254

255 Other studies evaluated attitudes and beliefs towards masking and isolating from family members if exposed to  
256 SARS-CoV-2, although they did not prospectively measure household contacts' behavior. In the United  
257 Kingdom, adults were asked whether they would self-isolate away from home if infected or exposed if they  
258 were provided appropriate accommodations at no cost.[20] Among participants who noted that they would not  
259 be able to isolate from family members at home if infected, 56% noted that would definitely or probably accept  
260 accommodations if offered to them. Many of these individuals cited household size and the number of  
261 household residents as barriers to isolating within the home. In interviews, low-income participants and  
262 participants from racial and ethnic minority communities highlighted the elevated risk of exposure they faced at  
263 work as a driving force to accept free accommodations outside the home.

264

265 In our study, similar concerns may also explain why BIPOC household contacts and contacts living in high-  
266 density households were more likely to have masked at home, although we did not ask household contacts  
267 why they masked. While there was no clear association between living density and masking after adjusting for  
268 BIPOC race/ethnicity, BIPOC participants were overall more likely to live in high-density households. It is  
269 plausible that participants of color within our study understandably had a greater concern of contracting and  
270 surviving infection, given highly publicized racial disparities in COVID-19 infection and fatalities as early as  
271 Spring, 2020.[21,22] These concerns could have motivated BIPOC participants to mask at home, given  
272 structural barriers to isolation such as high living density, and the lack of government-sponsored  
273 accommodations for exposed or infected individuals to isolate in North Carolina and much of the US.

274

275 In our study, household contacts who observed their index case masking at home were themselves more likely  
276 to mask. Household members may share similar beliefs around the efficacy of masking, the science of SARS-  
277 CoV-2 transmission, and the severity of the virus.[8] In a 'Prisoners' Dilemma' simulation of mask wearing  
278 among US adults, participants who chose not to wear masks were more likely to cooperate with non-mask  
279 wearers than mask-wearers, suggesting that in-group dynamics and social identity play a role in the decision to  
280 mask.[23] Together, findings from our study and the Prisoners' Dilemma simulation suggest that campaigns

It is made available under a [CC-BY-NC 4.0 International license](https://creativecommons.org/licenses/by-nc/4.0/) .

281 encouraging infected and symptomatic individuals to mask at home may encourage their household members  
282 to mask as well. In-home masking may be particularly feasible for asymptomatic positive individuals, whereas  
283 some individuals with respiratory symptoms or young children may find it difficult to mask consistently.  
284 Moreover, masking is not recommended during sleep,[24] underscoring the importance of having the ability to  
285 sleep in a separate bedroom from infected individuals.

286  
287 Our analyses of bedroom-sharing identified that household contacts who worked outside the home in the  
288 previous week or who had risk factors for severe COVID-19 were less likely to share a bedroom with the index  
289 case, and that individuals with 4 or more days of symptoms were more likely to have shared a bedroom with  
290 the index case. In our cohort, secondary infections were more likely among household contacts who shared a  
291 bedroom with the index case.[4] Our findings suggest that household contacts who faced steeper  
292 consequences of infection (e.g. missed days of work, higher risk of severe COVID-19) opted not to share a  
293 bedroom with the index case where possible.

294  
295 Strengths of our study include the longitudinal design, a racially diverse sample, the use of multiple imputation  
296 to account for missing data, and the unique scope of our question on structural household factors associated  
297 with behaviors that affect household transmission. Our study nonetheless is limited by sample size. The  
298 masking variable was phrased as ‘ever masked at home’ versus not, which does not measure masking  
299 frequency. Additionally, while the study was prospective, behavioral outcomes were ascertained only at two  
300 timepoints. Lastly, recall bias and social desirability bias could weaken the validity of our results.

301  
302 We investigated predictors of physical distancing behaviors among household contacts exposed to SARS-  
303 CoV-2 in a period of high susceptibility to COVID-19 infection. Vaccines were not available and most people  
304 were un-exposed.[25] Today, widespread vaccination and therapeutics (e.g., nirmatrelvir and ritonavir) have  
305 reduced the risk of severe disease.[26,27] However the risk of household transmission and long COVID-19  
306 complications remains considerable,[28–30] given increased transmissibility and immune escape among new  
307 variants leading to an increase in breakthrough infections and reinfections.[31] In the ongoing phase of the  
308 COVID-19 pandemic, our findings support additional congressional funding to continue the Biden  
309 administration’s SARS-CoV-2 at-home rapid antigen test distribution program to any American household. We  
310 also encourage the administration to distribute N95 masks at the federal level, given the prohibitive cost for  
311 large households. Virtually no published studies have assessed the attitudes and motivations for masking and  
312 isolating among infected and exposed household members in the US, a large and diverse country where many  
313 communities likely have their own beliefs and barriers around masking and isolation at home. Nonetheless, we  
314 have sufficient information to justify public health campaigns increasing the feasibility and social desirability of

It is made available under a [CC-BY-NC 4.0 International license](#) .

masking and isolating among exposed household members where possible, and the need for government and private-sector support of outside accommodations where isolation and masking are impossible.

## ACKNOWLEDGEMENTS:

We thank the CO-HOST study participants for their generous time and participation in the study. We are also grateful to Brian Pence, Joséé Dussault, and the UNC Center for AIDS Research Biostatistics Core for valuable input and support to improve the manuscript.

## COMPETING INTERESTS:

KRM has received grant support Ridgeback Biotherapeutics LP (2020-2021), the Bill & Melinda Gates Foundation, and has HIV collaborations, unrelated to this study, with Gilead Sciences (ongoing). All other authors declare no conflicts of interest related to the content of this manuscript.

## FUNDING:

Funding for the CO-HOST study and authors was supported by funds and charitable contributions from the UNC Department of Medicine, UNC COVID-19 Response Fund/Health Foundation, a Gillings Innovations Lab Award, and the National Center for Advancing Translational Sciences (NCATS), National Institutes of Health (NIH), through Grant Award Number UL1TR002489. RJR has been funded by the NIH in 2018-2020 (2 T32 GM 8719-21), and from 2022-present (5T32DK007634-33), as well as the UNC Graduate School, GlaxoSmithKline, and CERobs, LLC. WM, CAC, and KRM were supported by the UNC Center for AIDS Research, an NIH funded program (P30 AI050410).

## DATA AVAILABILITY:

De-identified participant-level data are available upon reasonable request from Rebecca Rubinstein by emailing [Rebecca\\_rubinstein@med.unc.edu](mailto:Rebecca_rubinstein@med.unc.edu). Please cite this manuscript upon use in further publications.

## REFERENCES:

- 1 He X, Lau EHY, Wu P, et al. Temporal dynamics in viral shedding and transmissibility of COVID-19. *Nat Med* 2020;26:672–5. doi:10.1038/s41591-020-0869-5
- 2 Tindale LC, Stockdale JE, Coombe M, et al. Evidence for transmission of COVID-19 prior to symptom onset. *Elife* 2020;9:e57149. doi:10.7554/eLife.57149

It is made available under a [CC-BY-NC 4.0 International license](https://creativecommons.org/licenses/by-nc/4.0/) .

- 346 3 Benefield AE, Skrip LA, Clement A, et al. SARS-CoV-2 viral load peaks prior to symptom onset: a  
347 systematic review and individual-pooled analysis of coronavirus viral load from 66 studies. *MedRxiv* 20202028  
348 [Preprint]. September 30, 2020 [cited 2021 Jun 01]. doi:10.1101/2020.09.28.20202028
- 349 4 Cerami C, Popkin-Hall ZR, Rapp T, et al. Household Transmission of Severe Acute Respiratory  
350 Syndrome Coronavirus 2 in the United States: Living Density, Viral Load, and Disproportionate Impact on  
351 Communities of Color. *Clin Infect Dis* 2021;ciab701. doi:10.1093/cid/ciab701
- 352 5 Grijalva CG, Rolfes MA, Zhu Y, et al. Transmission of SARS-COV-2 Infections in Households -  
353 Tennessee and Wisconsin, April-September 2020. *MMWR Morb Mortal Wkly Rep* 2020;69:1631–4.  
354 doi:10.15585/mmwr.mm6944e1
- 355 6 Sachdev DD, Chew Ng R, Sankaran M, et al. Contact tracing outcomes among household contacts of  
356 fully vaccinated COVID-19 patients - San Francisco, California, January 29-July 2, 2021. *Clin Infect Dis*  
357 2021;ciab1042. doi:10.1093/cid/ciab1042
- 358 7 Jansen L, Tegomoh B, Lange K, et al. Investigation of a SARS-CoV-2 B.1.1.529 (Omicron) Variant  
359 Cluster — Nebraska, November–December 2021. *MMWR Morb Mortal Wkly Rep* 2021;70:1782–4.  
360 doi:10.15585/mmwr.mm705152e3
- 361 8 Baker JM, Nakayama JY, O’Hegarty M, et al. SARS-CoV-2 B.1.1.529 (Omicron) Variant Transmission  
362 Within Households - Four U.S. Jurisdictions, November 2021-February 2022. *MMWR Morb Mortal Wkly Rep*  
363 2022;71:341–6. doi:10.15585/mmwr.mm7109e1
- 364 9 Julin CH, Robertson AH, Hungnes O, et al. Household Transmission of SARS-CoV-2: A Prospective  
365 Longitudinal Study Showing Higher Viral Load and Increased Transmissibility of the Alpha Variant Compared  
366 to Previous Strains. *Microorganisms* 2021;9:2371. doi:10.3390/microorganisms9112371
- 367 10 VoPham T, Weaver MD, Adamkiewicz G, et al. Social Distancing Associations with COVID-19 Infection  
368 and Mortality Are Modified by Crowding and Socioeconomic Status. *Int J Environ Res Public Health*  
369 2021;18:4680. doi:10.3390/ijerph18094680
- 370 11 Martinez DA, Klein EY, Parent C, et al. Latino Household Transmission of Severe Acute Respiratory  
371 Syndrome Coronavirus 2. *Clin Infect Dis* 2021;ciab753. doi:10.1093/cid/ciab753
- 372 12 Achenbach J, Bever L, Booth W, et al. What you need to know about the coronavirus variants.  
373 Washington Post. 2021.<https://www.washingtonpost.com/health/2021/11/29/covid-variants/> (accessed 18 Jul  
374 2022).
- 375 13 Sah P, Vilches TN, Moghadas SM, et al. Accelerated vaccine rollout is imperative to mitigate highly  
376 transmissible COVID-19 variants. *EClinicalMedicine* 2021;35:100865. doi:10.1016/j.eclinm.2021.100865
- 377 14 Mandavilli A. Reaching ‘Herd Immunity’ Is Unlikely in the U.S., Experts Now Believe. The New York  
378 Times. 2021.<https://www.nytimes.com/2021/05/03/health/covid-herd-immunity-vaccine.html> (accessed 6 Jan  
379 2022).
- 380 15 Kaiser Family Foundation. KFF COVID-19 Vaccine Monitor Dashboard | KFF.  
381 <https://www.kff.org/coronavirus-covid-19/dashboard/kff-covid-19-vaccine-monitor-dashboard/> (accessed 6 Jan  
382 2022).
- 383 16 Yang Z, Sun X, Hardin JW. A note on the tests for clustered matched-pair binary data. *Biom J*  
384 2010;52:638–52. doi:10.1002/bimj.201000035
- 385 17 Gopstein D. clust. bin. pair: Statistical Methods for Analyzing Clustered Matched Pair Data. 2016.  
386 <https://CRAN.R-project.org/package=clust.bin.pair> (accessed 15 Feb 2021).
- 387 18 Quartagno M, Carpenter J. jomo: Multilevel Joint Modelling Multiple Imputation. 2022.[https://CRAN.R-](https://CRAN.R-project.org/package=jomo)  
388 [project.org/package=jomo](https://CRAN.R-project.org/package=jomo) (accessed 31 May 2022).

It is made available under a [CC-BY-NC 4.0 International license](https://creativecommons.org/licenses/by-nc/4.0/) .

- 389 19 Carpenter JR, Kenward MG. Multiple Imputation and its Application: Carpenter/Multiple Imputation and  
390 its Application. Chichester, UK: John Wiley & Sons, Ltd 2013.doi:10.1002/9781119942283
- 391 20 Denford S, Morton K, Horwood J, et al. Preventing within household transmission of Covid-19: is the  
392 provision of accommodation to support self-isolation feasible and acceptable? *BMC Public Health* 2021;21:1–  
393 13. doi:10.1186/s12889-021-11666-z
- 394 21 Opiel Jr RA, Gebeloff R, Lai KKR, et al. The Fullest Look Yet at the Racial Inequity of Coronavirus.  
395 The New York Times. 2020.[https://www.nytimes.com/interactive/2020/07/05/us/coronavirus-latinos-african-](https://www.nytimes.com/interactive/2020/07/05/us/coronavirus-latinos-african-americans-cdc-data.html)  
396 [americans-cdc-data.html](https://www.nytimes.com/interactive/2020/07/05/us/coronavirus-latinos-african-americans-cdc-data.html) (accessed 18 Jul 2022).
- 397 22 Peck P. The Virus Is Showing Black People What They Knew All Along. The Atlantic.  
398 2020.<https://www.theatlantic.com/health/archive/2020/12/pandemic-black-death-toll-racism/617460/> (accessed  
399 18 Jul 2022).
- 400 23 Powdthavee N, Riyanto YE, Wong ECL, et al. When face masks signal social identity: Explaining the  
401 deep face-mask divide during the COVID-19 pandemic. *PLoS One* 2021;16:e0253195.  
402 doi:10.1371/journal.pone.0253195
- 403 24 Virginia Department of Health. Protect your health: masks. Coronavirus.  
404 <https://www.vdh.virginia.gov/coronavirus/protect-yourself/masks/> (accessed 27 Aug 2022).
- 405 25 Pei S, Yamana TK, Kandula S, et al. Burden and characteristics of COVID-19 in the United States  
406 during 2020. *Nature* 2021;598:338–41. doi:10.1038/s41586-021-03914-4
- 407 26 Najjar-Debbiny R, Gronich N, Weber G, et al. Effectiveness of Paxlovid in Reducing Severe  
408 Coronavirus Disease 2019 and Mortality in High-Risk Patients. *Clin Infect Dis* 2022;ciac443.  
409 doi:10.1093/cid/ciac443
- 410 27 Lamb YN. Nirmatrelvir Plus Ritonavir: First Approval. *Drugs* 2022;82:585–91. doi:10.1007/s40265-022-  
411 01692-5
- 412 28 Jørgensen SB, Nygård K, Kacelnik O, et al. Secondary Attack Rates for Omicron and Delta Variants of  
413 SARS-CoV-2 in Norwegian Households. *JAMA* 2022;327:1610. doi:10.1001/jama.2022.3780
- 414 29 Madewell ZJ, Yang Y, Longini IM, et al. Household Secondary Attack Rates of SARS-CoV-2 by Variant  
415 and Vaccination Status: An Updated Systematic Review and Meta-analysis. *JAMA Netw Open*  
416 2022;5:e229317. doi:10.1001/jamanetworkopen.2022.9317
- 417 30 Antonelli M, Pujol JC, Spector TD, et al. Risk of long COVID associated with delta versus omicron  
418 variants of SARS-CoV-2. *The Lancet* 2022;399:2263–4. doi:10.1016/S0140-6736(22)00941-2
- 419 31 Yi C, Sun X, Ling Z, et al. Jigsaw puzzle of SARS-CoV-2 RBD evolution and immune escape. *Cell Mol*  
420 *Immunol* 2022;19:848–51. doi:10.1038/s41423-022-00884-z

421

422 **SUPPLEMENTAL MATERIAL:**

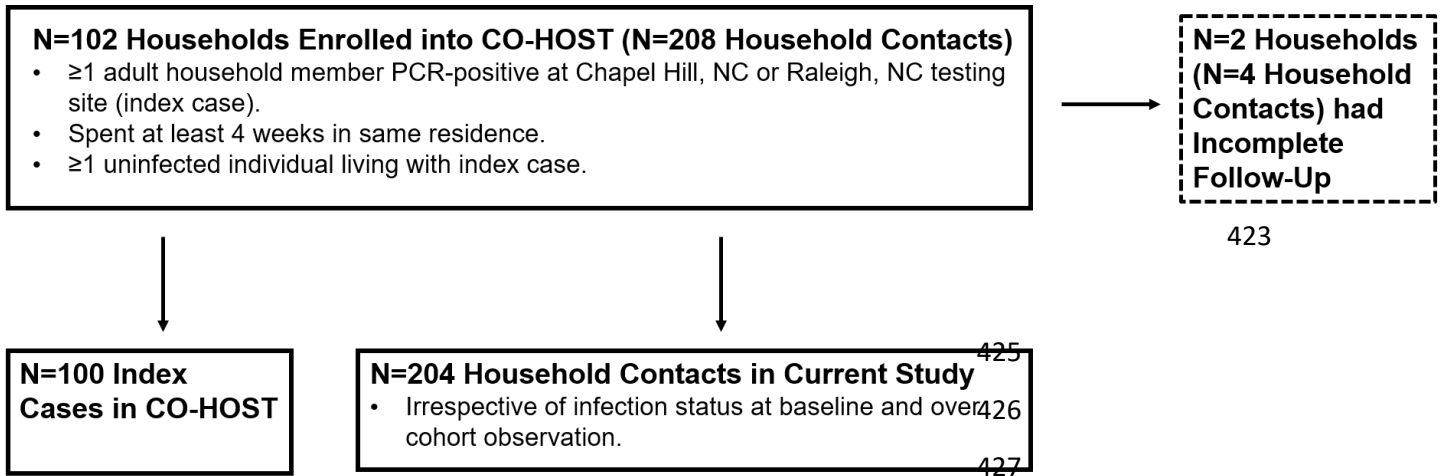

428 **Figure S1.** Inclusion diagram. CO-HOST refers to the parent study from which this secondary analysis is  
429 derived. 2 households consisting of 2 index cases and 4 household contacts were unable to be included in this  
430 study due to insufficient follow up. This study utilized the 204 remaining household contacts.  
431  
432  
433  
434  
435  
436  
437  
438  
439  
440  
441  
442  
443  
444  
445  
446  
447  
448  
449  
450



It is made available under a [CC-BY-NC 4.0 International license](https://creativecommons.org/licenses/by-nc/4.0/) .

**Mask Use Inside Home at Day 14**  
Prevalence Ratio and 95% CI

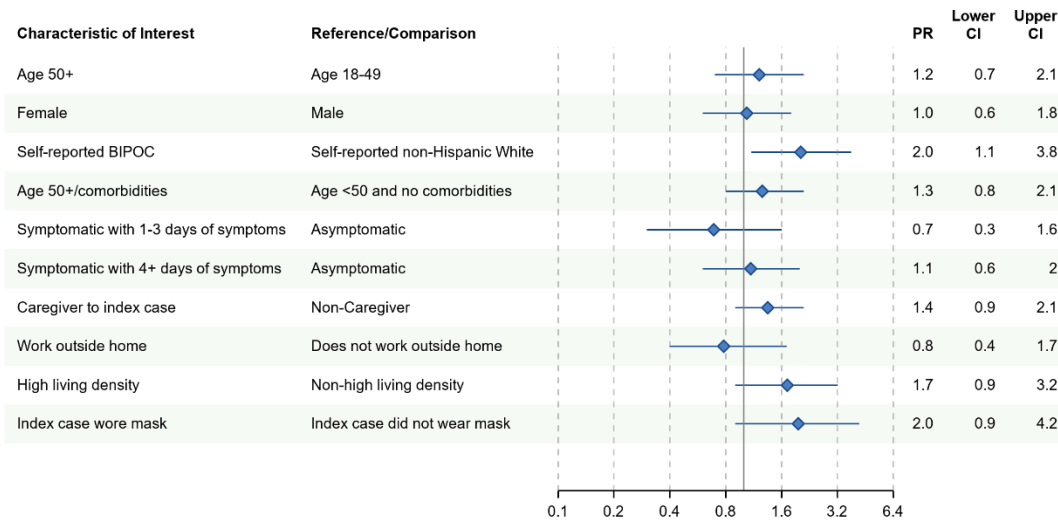

451

452 **Figure S2.** Bivariate sensitivity analyses of factors associated with using a mask at home at any time at Day  
 453 14 of cohort participation. Solid dots (PR) and solid lines (95% CI) display imputed estimates using chained  
 454 multiple imputation for clustered data. PR and 95% CI graphed on the natural log scale. Vertical solid line  
 455 denotes the null value of the PR (PR=1.0) on the exponentiated scale. X-axis labels correspond to the  
 456 exponentiated scale. BIPOC=Black, Indigenous, People of Color. Table denotes the PR, lower 95% CI and  
 457 upper 95% CI.

458

459

460

461

462

463

464

465

466

467

468

469

470

471

472

473

474

475

It is made available under a [CC-BY-NC 4.0 International license](https://creativecommons.org/licenses/by-nc/4.0/).

**Shared Bedroom with Index Case Between Days 7-14**  
Prevalence Ratio and 95% CI

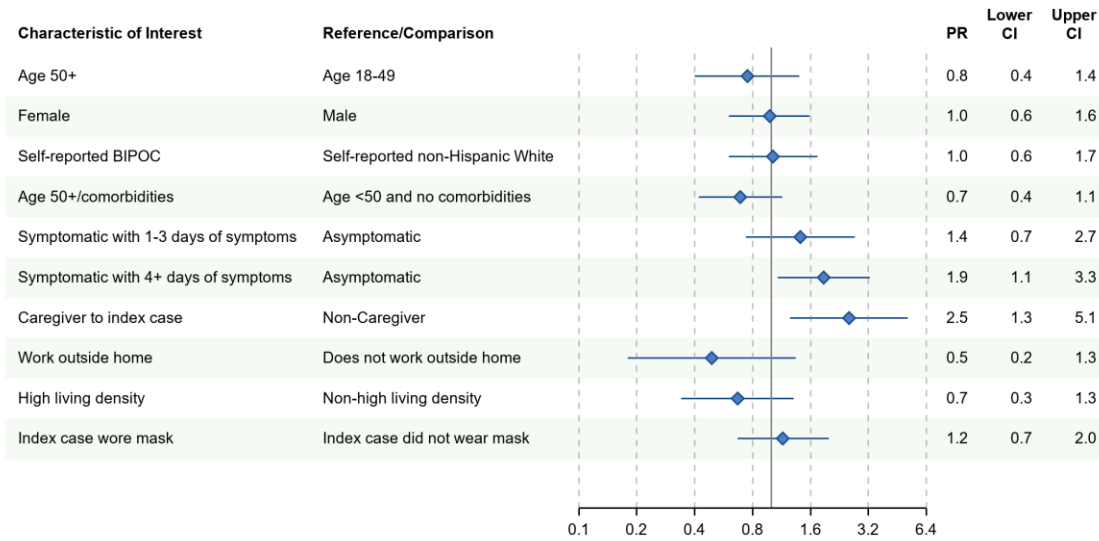

**Figure S3.** Bivariate sensitivity analyses of factors associated with sharing a bedroom with the index case at any time between Days 7-14 of cohort participation. Solid dots (PR) and solid lines (95% CI) display imputed estimates using chained multiple imputation for clustered data. PR and 95% CI graphed on transformed natural log scale. Vertical solid line denotes the null value of the PR (PR=1.0) on the exponentiated scale. X-axis labels correspond to the exponentiated scale. BIPOC=Black, Indigenous, People of Color. Table denotes the PR, lower 95% CI and upper 95% CI.

It is made available under a [CC-BY-NC 4.0 International license](https://creativecommons.org/licenses/by-nc/4.0/) .

**Table S1.** Number and proportion of household contacts engaging in reported behaviors at study entry and Day 14. P-values were calculated using Yang's test for changes between Day 0-14 on complete cases. 85 participants were missing 'masking at home' responses and 119 were evaluable. 41 participants were missing responses for all other variables and 163 participants were evaluable. See Figure 1 in main text.

| <b>Behavior</b>          | <b>N (%) Household Contacts Reporting at Cohort Entry</b> | <b>N (%) Household Contacts Reporting at Day 14</b> | <b>P-value</b> |
|--------------------------|-----------------------------------------------------------|-----------------------------------------------------|----------------|
| Share kitchen            | 148 (91)                                                  | 124 (76)                                            | 0.003          |
| Eat together             | 111 (68)                                                  | 90 (55)                                             | 0.013          |
| Share bathroom           | 105 (65)                                                  | 92 (56)                                             | 0.066          |
| Watch TV together        | 103 (63)                                                  | 89 (55)                                             | 0.068          |
| Share car rides          | 101 (62)                                                  | 66 (41)                                             | <0.001         |
| Share electronic devices | 65 (40)                                                   | 54 (33)                                             | 0.092          |
| Share bedroom            | 58 (36)                                                   | 44 (27)                                             | 0.015          |
| Masking at home          | 28 (24)                                                   | 31 (26)                                             | 0.614          |

It is made available under a [CC-BY-NC 4.0 International license](https://creativecommons.org/licenses/by-nc/4.0/) .

**Table S2.** Number (row %) of household contacts living in high density households among self-reported race/ethnicity and masking behavior.

| <b>Mask Use Inside Home Between Days 7-14</b> | <b>Race/Ethnicity</b>     | <b>High Living Density</b> |           |              |
|-----------------------------------------------|---------------------------|----------------------------|-----------|--------------|
|                                               |                           | <b>Yes</b>                 | <b>No</b> | <b>Total</b> |
| <b>Yes</b>                                    | <b>Non-Hispanic White</b> | 2 (13)                     | 13 (87)   | 15 (100)     |
|                                               | <b>BIPOC</b>              | 12 (57)                    | 9 (43)    | 21 (100)     |
| <b>No</b>                                     | <b>Non-Hispanic White</b> | 7 (10)                     | 61 (90)   | 68 (100)     |
|                                               | <b>BIPOC</b>              | 14 (54)                    | 12 (46)   | 26 (100)     |

551  
552  
553  
554  
555  
556  
557  
558  
559  
560  
561  
562  
563  
564  
565  
566  
567  
568  
569  
570  
571  
572  
573  
574  
575  
576

It is made available under a [CC-BY-NC 4.0 International license](#) .

577  
578  
579

**Table S3.** Number (%) of household contacts living in high density households among self-reported race/ethnicity and bedroom sharing with index case.

| Shared Bedroom with Index Case Between Days 7-14 | Race/Ethnicity     | High Living Density |         |          | 580 |
|--------------------------------------------------|--------------------|---------------------|---------|----------|-----|
|                                                  |                    | Yes                 | No      | Total    | 581 |
| Yes                                              | Non-Hispanic White | 1 (4)               | 27 (96) | 28 (100) | 582 |
|                                                  | BIPOC              | 8 (53)              | 7 (47)  | 15 (100) | 583 |
| No                                               | Non-Hispanic White | 10 (14)             | 64 (87) | 74 (100) | 584 |
|                                                  | BIPOC              | 21 (47)             | 24 (53) | 45 (100) | 585 |

It is made available under a [CC-BY-NC 4.0 International license](https://creativecommons.org/licenses/by-nc/4.0/) .

587  
588

**Table S4.** Frequency and prevalence of household contacts who reported ever masking or ever sharing a bedroom with the index case between Days 7-14 of cohort participation.

| Outcome:<br>Household-Contact<br>Characteristics                         | Mask Use Inside the Home |            | Sharing a Bedroom |            |
|--------------------------------------------------------------------------|--------------------------|------------|-------------------|------------|
|                                                                          | N                        | Prevalence | N                 | Prevalence |
| Age (restricted to 18 and older)                                         |                          |            |                   |            |
| 18-49 (ref)                                                              | 16                       | 0.26       | 24                | 0.33       |
| 50+                                                                      | 9                        | 0.36       | 8                 | 0.24       |
| Sex                                                                      |                          |            |                   |            |
| Male (ref)                                                               | 15                       | 0.26       | 20                | 0.27       |
| Female                                                                   | 21                       | 0.29       | 24                | 0.27       |
| Race/Ethnicity                                                           |                          |            |                   |            |
| Non-Hispanic White                                                       | 15                       | 0.18       | 28                | 0.27       |
| Participants of Color                                                    | 21                       | 0.45       | 16                | 0.26       |
| Aged 50 or older or any comorbidities <sup>a</sup>                       |                          |            |                   |            |
| No                                                                       | 12                       | 0.21       | 24                | 0.35       |
| Yes                                                                      | 24                       | 0.35       | 19                | 0.22       |
| Missing                                                                  | 6                        |            | 6                 |            |
| Duration of COVID-19 Symptoms <sup>b</sup>                               |                          |            |                   |            |
| No symptoms                                                              | 20                       | 0.18       | 18                | 0.16       |
| 1-3 days                                                                 | 5                        | 0.16       | 8                 | 0.26       |
| 4 or more days                                                           | 7                        | 0.22       | 12                | 0.38       |
| Missing                                                                  | 28                       |            | 28                |            |
| Caregiver to index case <sup>b</sup> (restricted to 18 and older)        |                          |            |                   |            |
| No                                                                       | 10                       | 0.24       | 7                 | 0.15       |
| Yes                                                                      | 15                       | 0.34       | 23                | 0.47       |
| Missing                                                                  | 0                        |            | 2                 |            |
| Work outside home on most days <sup>b</sup> (restricted to 18 and older) |                          |            |                   |            |
| No                                                                       | 22                       | 0.32       | 29                | 0.33       |
| Yes                                                                      | 3                        | 0.17       | 3                 | 0.16       |
| Live in household with high living density                               |                          |            |                   |            |
| No                                                                       | 22                       | 0.16       | 35                | 0.29       |
| Yes                                                                      | 14                       | 0.22       | 9                 | 0.21       |
| Missing                                                                  | 74                       |            | 0                 |            |
| Index case wore mask <sup>b</sup> (include all age groups)               |                          |            |                   |            |
| No                                                                       | 4                        | 0.09       | 15                | 0.25       |
| Yes                                                                      | 32                       | 0.37       | 27                | 0.27       |
| Missing                                                                  | 0                        |            | 3                 |            |

589  
590  
591  
592  
593  
594  
595  
596  
597

a We considered individuals aged 50 or older or those with at least one comorbidity to be at higher risk for severe COVID-19 infection. If the household contact was the only member of their household with higher risk for severe COVID-19 infection, they were placed in the reference group. Household contacts who resided in households in which some members were not enrolled in COHOST, and where there were no known household members over aged 50 or with comorbidities, were coded as missing.

b Between days 7-14 of cohort observation
